# Supplementary material
Source: Springer Nature journal article supplement (https://www.springermedizin.de/resource/supplementary/12913_2011_1995_MOESM4_ESM.pdf/9530596)

■ VA □ Medicare

### Primary Care

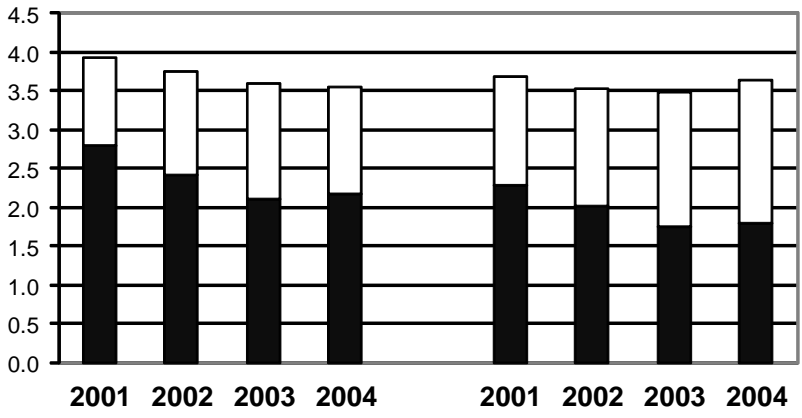

### Specialty Care

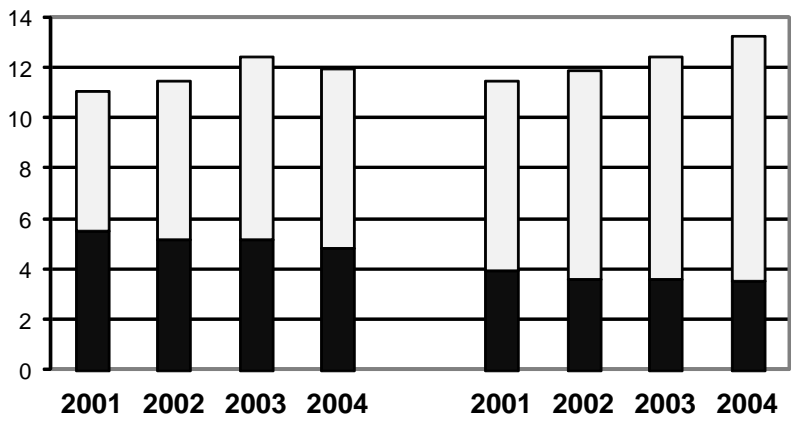

### Mental Health Care

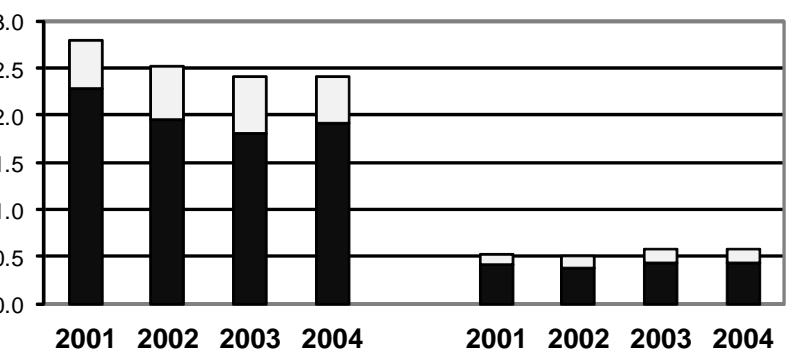

Disability

Age

Supplement: MOESM4 [file 9530596]
